# Supplementary material
Source: PubMed Central journal article supplement (PMC4755350)
Supplement: NIHMS747718-supplement-Online_Supplement.pdf [file NIHMS747718-supplement-Online_Supplement.pdf]

## ONLINE SUPPLEMENT

### PATTERNS AND CORRELATES OF BASELINE THIAZIDE-TYPE DIURETIC PRESCRIPTION IN THE SYSTOLIC BLOOD PRESSURE INTERVENTION TRIAL (SPRINT)

#### **Authors & Affiliations:**

Tara I. Chang, Stanford University School of Medicine  
Gregory Evans, Wake Forest School of Medicine  
Alfred K. Cheung, University of Utah  
William C. Cushman, Memphis Veterans Affairs Medical Center  
Matthew J Diamond, The Medical College of Georgia at Georgia Regents University  
Jamie P. Dwyer, Vanderbilt University  
Yonghong Huan, University of Pennsylvania  
Dalane Kitzman, Wake Forest School of Medicine  
John B. Kostis, Robert Wood Johnson Medical School  
Suzanne Oparil, University of Alabama at Birmingham  
Anjay Rastogi, University of California, Los Angeles  
Christianne Roumie, Tennessee Valley Health Care Center & Vanderbilt University  
Rukmani Sahay, Stanford University School of Medicine  
Randall S. Stafford, Stanford University School of Medicine  
Addison A. Taylor, Michael E. DeBakey VA Medical Center and Baylor College of Medicine  
Jackson T. Wright Jr., Case Western Reserve University  
Glenn M. Chertow, Stanford University School of Medicine  
*For the SPRINT Study Research Group*

#### **Corresponding Author:**

Tara I. Chang, MD, MS  
Assistant Professor of Medicine  
Stanford Division of Nephrology  
777 Welch Road Suite DE  
Palo Alto, CA 94304  
650-724-1297 (phone)  
650-721-1443 (fax)  
tichang@stanford.edu

---

**Table S1.** Baseline antihypertensive medication use in 7582 SPRINT participants

prescribed at least 1 antihypertensive medication.

---

| <b>Variable</b>                             | <b>%</b> |
|---------------------------------------------|----------|
| Number of antihypertensive agents           |          |
| 1                                           | 32.1     |
| 2                                           | 39.1     |
| 3+                                          | 28.7     |
| Thiazide-type diuretic                      | 43.2     |
| Angiotensin converting enzyme inhibitor     | 41.0     |
| Angiotensin II receptor blocker             | 23.6     |
| Beta-blocker                                | 39.5     |
| Dihydropyridine calcium channel blocker     | 33.0     |
| Non-dihydropyridine calcium channel blocker | 6.0      |
| Loop diuretic                               | 5.0      |
| Mineralocorticoid receptor antagonists      | 2.1      |
| Direct renin inhibitors                     | 0.4      |
| Alpha-blocker                               | 4.4      |
| Centrally acting agent                      | 2.4      |
| Direct vasodilator                          | 1.7      |

---

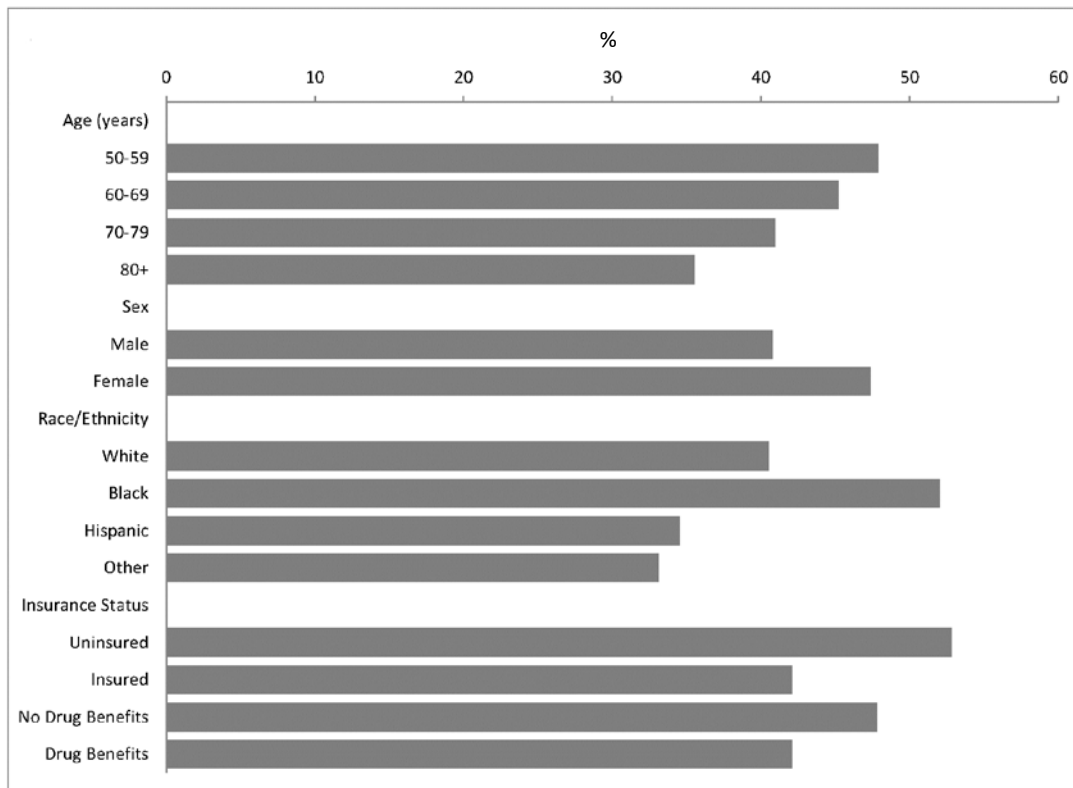

**Figure S1:** Prevalence of baseline thiazide prescription in 7582 SPRINT participants prescribed at least 1 antihypertensive medication at baseline, among specified subgroups based on demographics.

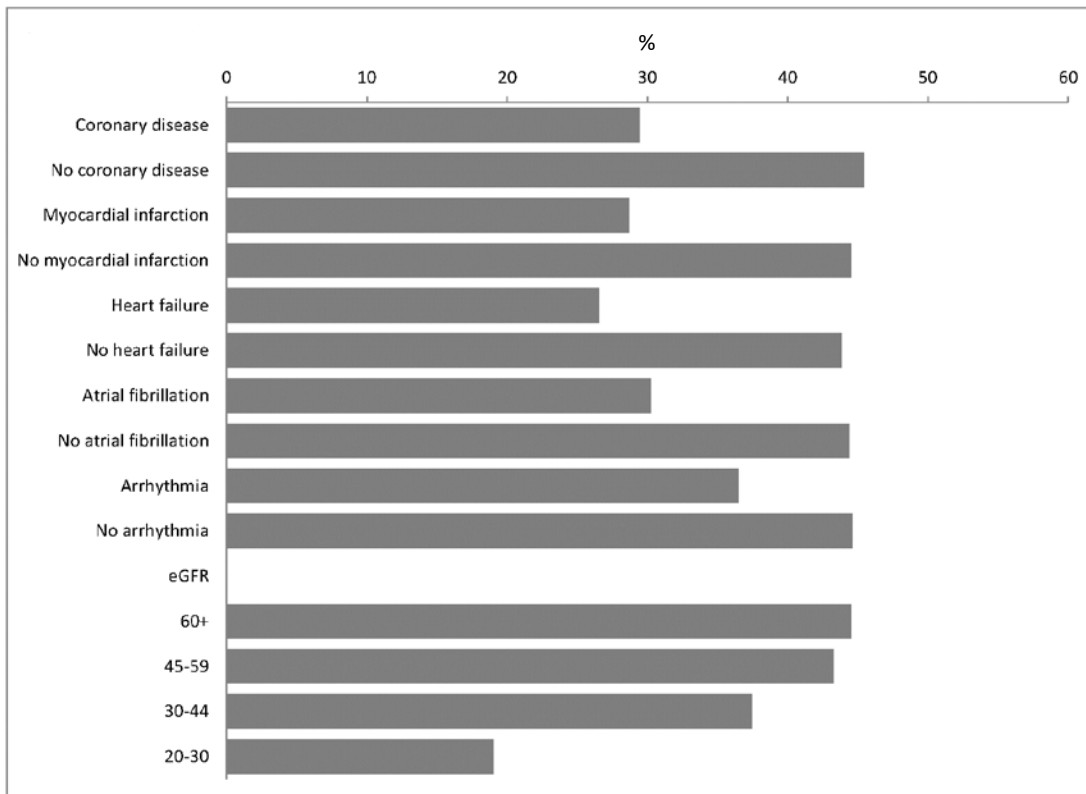

**Figure S2:** Prevalence of baseline thiazide prescription in 7582 SPRINT participants prescribed at least 1 antihypertensive medication at baseline, among specified subgroups based on comorbid conditions

Abbreviation: eGFR = estimated glomerular filtration rate, in mL/min per 1.73m<sup>2</sup>
